# Supplementary material
Source: Springer Nature journal article supplement (https://www.springermedizin.de/resource/supplementary/12913_2011_2452_MOESM4_ESM.pdf/9530500)
Supplement: MOESM4 [file 9530500]

Inclusion of 2000 patients of whom 1000 Dutch and 1000 non-Western  
*Informed consent*

Sub-sample of max.60 patients

### Questionnaire-patient self assessment

- Ethnic origin
- Migration history (if applicable)
- Socio-economic status
- Religion
- Cultural distance to Dutch healthcare system
- Dutch language proficiency\*
- Health literacy

*\*Includes additional researcher assessment of Dutch language proficiency*

### Record review

Phase 1: Nurse review

800-1000 records with triggers

1000-1200 records with out triggers

Phase 2: Physician review

Stop reviewing

100-160 records with adverse events

50-80 records with preventable adverse events

### In depth interviews

Max 120 interviews

Max 60 with patient

Max 60 with care provider
